# Supplementary material
Source: PubMed Central journal article supplement (PMC2678463)
Supplement: 0809284106_0809284106SI.pdf [file 0809284106_0809284106SI.pdf]

# Supporting Information

Lee and Bruno 10.1073/pnas.0809284106

## SI Text

**Field Sampling.** To compare our experimental systems with naturally-developed communities, we deployed 10 identical seagrass mimics in nearby seagrass beds for 10 days. These mobile grazer communities reach nearly static levels of richness and abundance between 4 and 6 days (1). Our data from a simultaneously-deployed field experiment indicates that species richness in the field is equivalent to that seen in our experiment. Species richness in experimental treatments receiving the most propagules was  $10.8 \pm 0.65$  (mean  $\pm$  SE) compared with  $10.5 \pm 0.56$  in identical-sized habitat patches deployed in a nearby seagrass bed. Highest observed species richness was 12 species in our experiment and 14 species in the field.

**Propagule Additions.** Final grazer species richness increased significantly with the estimated number of species added ( $R^2 = 0.24$ ,  $n = 30$ ,  $P < 0.006$ ; Fig. S1A). The mean number of species included in 4 treatment levels of grazer propagule supply was estimated by using rarefaction analysis of samples taken from the initial propagule pool ( $n = 20$ ). In supply treatments receiving a single addition, small additions received an estimated 123.5 total individuals of 8.85 species; medium–low, 246.9 individuals of 10.25 species; medium–high, 493.8 individuals of 11.59 species; large, 987.6 individuals of 12.8 species. A total of 15 species were observed in the additions.

1. Virnstein RW, Curran MC (1986) Colonization of artificial seagrass versus time and distance from source. *Mar Ecol Prog Ser* 29:279–288.

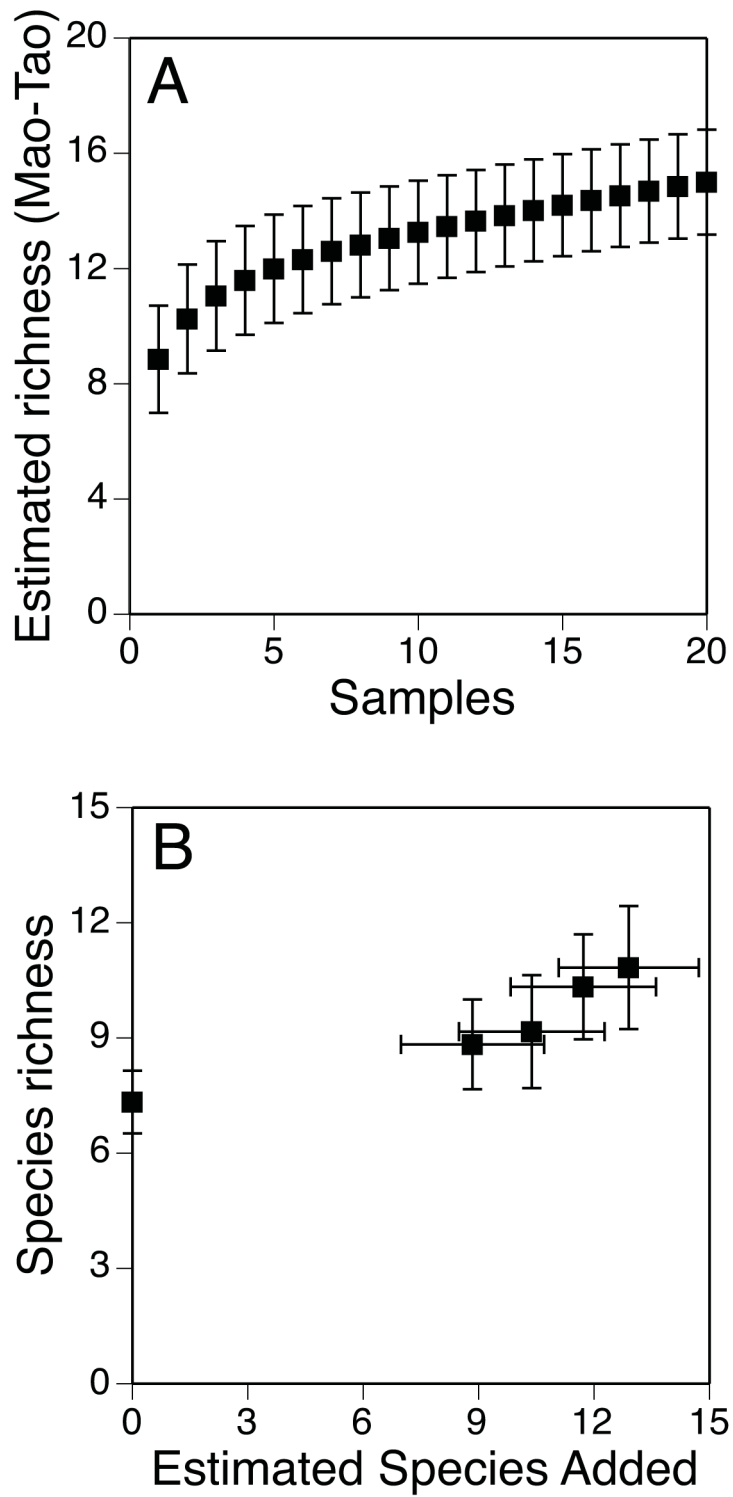

**Fig. S1.** (A) Mao-Tao expected species richness ( $\pm 1$  SD) as a function of accumulated samples (<http://purl.oclc.org/estimates>). (B) Relationship between observed species richness and estimated number of species added for single-frequency propagule additions.

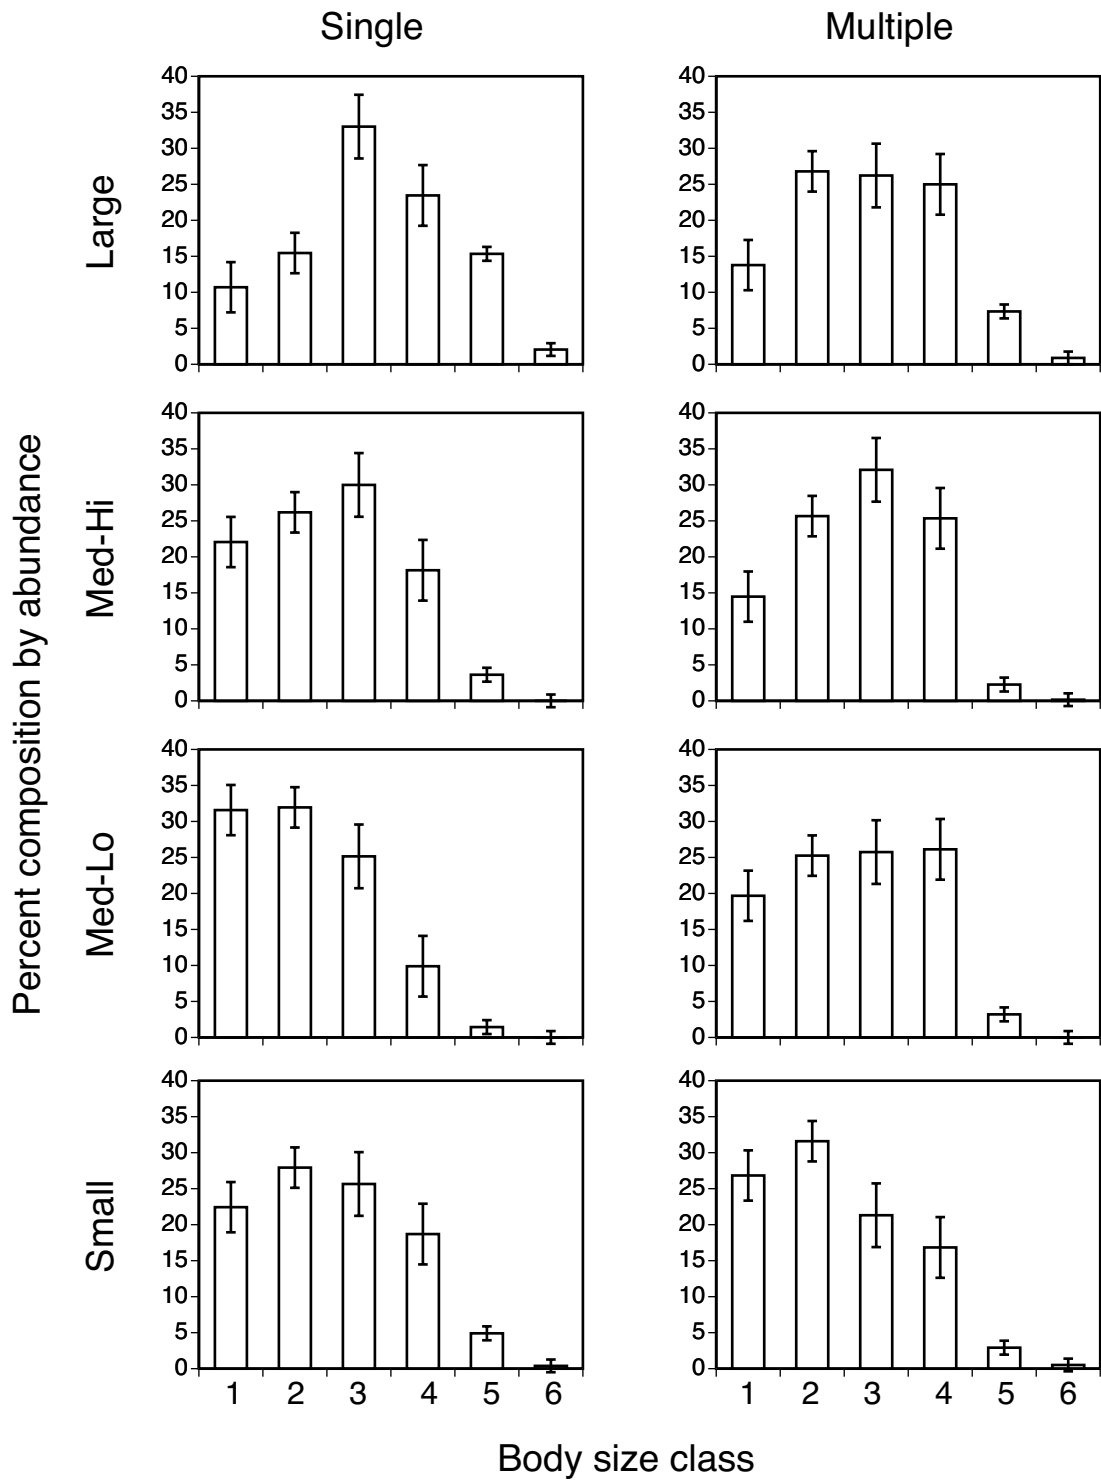

Fig. S2. Effect of propagule supply magnitude and frequency on proportion of amphipods in each size class (mean  $\pm$  1 SE,  $n = 3$ ).

**Table S1. Results of 2-factor ANOVA testing the effects of supply size and frequency on individual taxa abundance and percent gravid females**

| Response                    | Effect           | df | SS   | F     | P       | $\omega^2$ |
|-----------------------------|------------------|----|------|-------|---------|------------|
| Log(Ampithoidae + 1)        | Supply size      | 3  | 5.8  | 4.8   | <0.01   | 18.5       |
|                             | Error            | 40 | 15.9 |       |         |            |
| Log( <i>Dulichella</i> + 1) | Supply size      | 3  | 23.7 | 17.0  | <0.0001 | 23.1       |
|                             | Supply frequency | 1  | 52.8 | 113.8 | <0.0001 | 54.2       |
|                             | Error            | 40 | 18.6 |       |         |            |
| Log( <i>Elasmopus</i> + 1)  | Supply frequency | 1  | 5.7  | 16.8  | <0.001  | 25.0       |
|                             | Error            | 40 | 13.6 |       |         |            |
| Log( <i>Corophium</i> + 1)  | Supply frequency | 1  | 6.8  | 10.8  | <0.01   | 17.3       |
|                             | Error            | 40 | 25.4 |       |         |            |
| Log(Gastropoda + 1)         | Supply size      | 3  | 10.9 | 8.5   | <0.001  | 31.4       |
|                             | Supply frequency | 1  | 1.9  | 4.4   | <0.05   | 4.7        |
|                             | Error            | 40 | 17.0 |       |         |            |
| Log( <i>Paracerces</i> + 1) | Supply size      | 3  | 19.1 | 4.8   | <0.01   | 16.3       |
|                             | Supply frequency | 1  | 16.1 | 12.1  | <0.01   | 15.9       |
|                             | Error            | 40 | 53.0 |       |         |            |
| Log(Polychaeta + 1)         | Supply size      | 3  | 14.2 | 10.3  | <0.0001 | 33.6       |
|                             | Supply frequency | 1  | 3.8  | 8.2   | <0.01   | 8.7        |
|                             | Error            | 40 | 18.4 |       |         |            |
| Log(Caprellidae + 1)        | Supply size      | 3  | 10.6 | 4.0   | <0.05   | 15.3       |
|                             | Error            | 40 | 35.0 |       |         |            |
| Log(Pelecypoda + 1)         | Supply size      | 3  | 21.8 | 14.8  | <0.0001 | 33.1       |
|                             | Supply Frequency | 1  | 18.9 | 38.6  | <0.0001 | 30.0       |
|                             | Error            | 40 | 19.6 |       |         |            |
| % Ampithoidae gravid        | Supply size      | 3  | 0.04 | 2.5   | <0.07   |            |
|                             | Error            | 40 | 0.21 |       |         |            |

Only significant tests are listed.
